# Supplementary material for: Recombinant GPEHT Fusion Protein Derived from HTLV-1 Proteins with Alum Adjuvant Induces a High Immune Response in Mice
Source: MDPI journal article supplement (doi:10.3390/vaccines11010115), 2023-01-03
Supplement: s1 [file s1]

Supplementary S1. The densitometry intensity ratio of each band for the SDS-PAGE and Western blot.

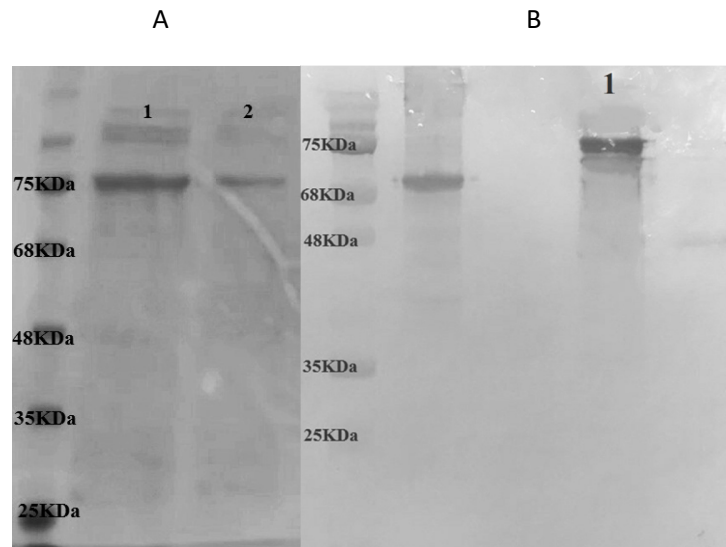

| Figure S1 (A) | Intensity  | Ratio |
|---------------|------------|-------|
| blot 1        | 114288.068 | 1     |
| blot 2        | 4321.468   | 26.44 |

| Figure S1(B) | Intensity | Ratio |
|--------------|-----------|-------|
| blot 1       | 51276.726 | 1     |
